## Association between prenatal alcohol exposure and children's facial shape. A prospective population-based cohort study

X. Liu<sup>1,2</sup>, M. Kayser<sup>3</sup>, S. A. Kushner<sup>4</sup>, H. Tiemeier<sup>5</sup>, F. Rivadeneira<sup>6,7</sup>, V. W. V. Jaddoe<sup>7,8</sup>, W. Niessen<sup>1,9</sup>, E.B. Wolvius<sup>2</sup>, G. V. Roshchupkin<sup>1,10</sup>

<sup>1</sup> Department of Radiology and Nuclear Medicine, Erasmus MC University Medical Center Rotterdam, Rotterdam, the Netherlands

<sup>2</sup> Department of Oral and Maxillofacial Surgery, Erasmus MC University Medical Center Rotterdam, Rotterdam, the Netherlands

<sup>3</sup> Department of Genetic Identification, Erasmus MC University Medical Center Rotterdam, Rotterdam the Netherlands

<sup>4</sup> Department of Psychiatry, Erasmus MC University Medical Center Rotterdam, Rotterdam the Netherlands

<sup>5</sup> Department of Social and Behavioral Science, Harvard T. H. Chan School of Public Health, Boston, MA, USA

<sup>6</sup> Department of Internal Medicine, Erasmus MC University Medical Center, Rotterdam, the Netherlands

<sup>7</sup> The Generation R Study, Erasmus MC University Medical Center Rotterdam, Rotterdam, the Netherlands

<sup>8</sup> Department of Pediatrics, Erasmus MC University Medical Center Rotterdam, Rotterdam the Netherlands

<sup>9</sup> Faculty of Applied Sciences, Delft University of Technology, Delft, the Netherlands

<sup>10</sup> Department of Epidemiology, Erasmus MC University Medical Center Rotterdam, Rotterdam the Netherlands

**Word count abstract:** 346

**Word count manuscript:** 3059

**References:** 45

**Tables:** 3

**Figures:** 5

**Supplementary tables:** 5

**Supplementary Figures:** 6

**\*\*Corresponding author:**

G. V. Roshchupkin

Address: Erasmus University Medical Center Rotterdam,  
Room Na25-xx. P.O. box 2040, 3000 CA, Rotterdam, the Netherlands

E-mail: [g.v.roshchupkin@erasmusresearch.nl](mailto:g.v.roshchupkin@erasmusresearch.nl) NOTE: This preprint reports new research that has not been certified by peer review and should not be used to guide clinical practice.

## **Key points:**

**Questions** Which level of prenatal alcohol exposure (PAE) is associated with children's facial shape at different lifetimes?

**Findings** A 3D facial phenotype analysis of 9- (N=3160) and 13- (N=2492) year-old children was conducted. PAE before and during pregnancy, even at low level, associates with the children's facial shape; the association becomes weaker as children grow older.

**Meaning** The results suggest avoiding drinking alcohol at least three months before and during pregnancy is the safest option for the child. More research is needed to investigate the consequences of PAE on children; the discovered facial phenotypes could be used as a biomarker for further investigations.

## ABSTRACT

**IMPORTANCE:** Children exposed to a high level of prenatal alcohol exposure (PAE) are more likely to develop fetal alcohol spectrum disorder with adverse phenotypes on their faces. However, it is still poorly understood, which level of PAE is associated with facial manifestation and if such associations persist during childhood.

**OBJECTIVE:** To examine the association between PAE and children's facial phenotype in a prospective multi-ethnic population-based study.

**DESIGN, SETTING, AND PARTICIPANTS:** This study was based on the Generation R Study, a prospective cohort from fetal life onwards with maternal and offspring data. Children had a 3D facial image taken at ages 9 (n=3160) and 13 years (n=2492).

**EXPOSURES:** We defined 6 levels of PAE based on the frequency and dose of alcohol consumption, and defined three tiers based on the timing of alcohol exposure of the unborn child.

**MAIN OUTCOMES AND MEASURES:** For image analysis, we used 3D graph convolutional networks for non-linear dimensionality reduction, which compressed the high-dimensional images into 200 endophenotypes representing facial morphology. These facial endophenotypes were used as dependent variables in a linear regression analysis to search for associations with PAE. Finally, to detect specific facial components associated with PAE, we mapped statistically significant endophenotypes back to the 3D facial shape. We generated heatmaps to display the facial changes associated with PAE. PAE prediction based on facial shape was also performed; the prediction accuracy was estimated by area under the receiver operating characteristic curve (AUC).

**RESULTS:** A significant association between PAE and facial shape was found in the 9-year-old children, at all levels of alcohol exposure: the higher the level of exposure, the stronger the association. Moreover, PAE before and during pregnancy was associated with facial shape. The most common detected facial phenotypes included turned-up nose tip, shortened nose, turned-out jaw and turned-in lower-eyelid-related regions. For the 13-year-old children, the associations were weaker and the AUCs lower than those of the 9-years-old children.

**CONCLUSIONS AND RELEVANCE:** PAE before and during pregnancy, even at low level, is associated with the facial shape of children, and these associations become weaker as children grow older.

## INTRODUCTION

High levels of prenatal alcohol exposure (PAE) during pregnancy can have significant adverse associations with a child's health development resulting in fetal alcohol spectrum disorder (FASD). FASD is defined as a combination of growth retardation, neurological impairment and recognizably abnormal facial development.<sup>1,2</sup> The association of low to moderate alcohol consumption with the child's health is less known, but could still have severe consequences for the child's health, including lower birth weight, smaller birth size and preterm birth.<sup>3,44</sup>

Facial morphology can serve as a biomarker for health conditions and indicate developmental problems.<sup>4, 5, 28, 29</sup> Since low to moderate alcohol consumption during pregnancy is associated with the child's development, it might be also associated with the facial morphology. However, the results of previous research are ambiguous.

Douglas<sup>6</sup> summarized the main approaches to detect the association between PAE and the human face, and concluded that compared with direct craniofacial anthropometry<sup>7</sup> or measurement from photographs,<sup>8</sup> 3D surface imaging is the most promising way to reduce measurement error. For this reason, Muggli et al.<sup>9</sup> performed a point-to-point 3D face registration analysis in a moderately sized study of 434 on 12-month-old infants. After adjusting for potential covariates, significant facial trait associations were found at low to moderate levels of PAE, mainly with shape of the jaw, forehead, nose, and areas near eyes. Howe et al.<sup>10</sup> performed a landmark-based distance measurement on the 3D face in 4233 children (mean age: 15.4), but found no evidence of association with PAE. One major limitation of the landmarking approach used by Howe et al. is that it does not capture the complexity of facial morphology. Additionally, the participants in the Howe et al. study were much older (mean age: 15.4) than those in the study of Muggli et al. and association of PAE with the facial morphology might attenuate during childhood and adolescence.<sup>17,18</sup> The present study addresses these limitations.

Recently, deep neural networks (DNNs),<sup>11</sup> a data-driven method, which can extract key information from high-dimensional input data, has become the state-of-the-art method for clinical applications<sup>12-14</sup>. One type of DNN architecture used for dimensionality reduction is the auto-

encoder,<sup>15</sup> typically consisting of an encoder and decoder. The encoder is able to compress the high-dimensional 3D facial shape into low-dimensional representations of the facial morphology. The decoder then resamples these representations back to reconstruct the 3D facial shape.

In this paper, we applied a deep learning algorithm to 3D photographs of children from a multi-ethnic prospective pregnancy cohort. We used an auto-encoder to reduce the facial complexity and then examined association of low-dimensional representation with PAE before and during pregnancy. Furthermore, we also attempted to predict PAE from children's facial shape, in order to test if facial morphology can be a biomarker that provides additional and independent clues for PAE diagnosis.

## METHODS

### *Design and study population*

This study was embedded in the Generation R Study. This is an ongoing population-based cohort study of pregnant women and their children from fetal life onwards. The goal is to identify early environmental and genetic causes leading to normal and abnormal growth, development, and health.<sup>16</sup> All women living in the study area of Rotterdam, the Netherlands, who delivered between April 2002 and January 2006 were eligible. The Medical Ethical Committee approved the study and all participants gave written informed consent. A total of 9,778 participants were enrolled in the Generation R Study. 3D facial images of the children were taken at 9 and 13 years old, 5423 and 4551 respectively. The population consisted of 17 different ethnicities. We selected 4 major ethnicities (Dutch, non-Dutch Western, Turkish and Moroccan) and clustered them into 2 groups: Western (including Dutch and non-Dutch Western) and non-Western (including Turkish and Moroccan). After data cleaning, 3160 9-year-old children and 2492 13-year-old children were included in our study, with 1878 children assessed at both ages.

### *Alcohol measurements*

Information about maternal alcohol consumption was obtained by postal questionnaires in early, mid-, and late pregnancy.<sup>3</sup> Mothers who reported any drinking were asked to classify their average alcohol consumption into one of the following 6 levels: <1 drink per week; 1–3 per week; 4–6 per week; 1 per day; 2–3 per day; >3 per day. An average alcoholic drink contains about 12 g of alcohol.

We defined 3 tiers to understand the association of alcohol exposure in different pregnancy stages. In all tiers, mothers who were abstinent before and during pregnancy comprised the control group. Settings of the exposed groups are shown in **Figure 1**. Tier 1 defined mothers only drinking 3 months before pregnancy as the exposed group, while tier 2 defined mothers drinking during pregnancy as the exposed group. In Tier 2a, mothers who drank during the first trimester of pregnancy, but were abstinent during the rest trimesters constituted the exposure group. Tier 2b followed similar exposure definitions as Tier 2a, but included mothers who also drink during the rest trimesters in the exposed. It is worth noting that 99% of mothers who drank during pregnancy also drank 3 months before pregnancy.

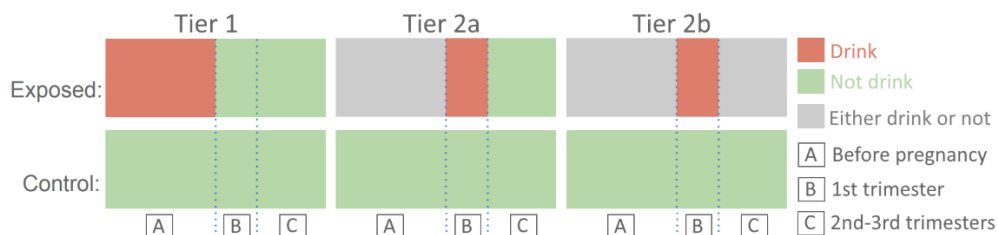

**Figure 1:** Definition of Tier 1, Tier 2a and Tier 2b.

### **Data preprocessing**

The 3D face images were collected with the 3dMD cameras system (3dMD Corp). The Distance and angle between the participants and cameras were fixed when taking photos. We adopted 3D morphology registration pipelines<sup>45</sup> to build the raw data into a template-based dataset, in which each facial shape was modelled by a 3D Graph<sup>27</sup> with the same vertex number and edge connectivity. More details about the data preprocessing can be found in the **Supplementary materials**.

### **Dimensionality reduction to generate facial endophenotypes**

We used a 3D graph auto-encoder<sup>21</sup> for high-dimensional facial shape analysis. As shown in **Figure 2**, the auto-encoder consists of Encoder and Decoder that can perform feature mapping in a non-linear manner. The Encoder compresses the high-dimensional 3D facial shape into  $N$  latent features, while the Decoder reconstructs the 3D facial shape from the latent features. By minimizing the error between input and reconstructed facial shapes, the main morphology of the facial shape is captured in the  $N$  latent features. The encoding and decoding process can be formulated as:

$$\mathbf{Z} = \text{Encode}(\mathbf{F}) \quad (1)$$

$$\mathbf{F}' = \text{Decode}(\mathbf{Z}) \quad (2)$$

where  $\mathbf{Z} = [z_0, z_1, \dots, z_N]$  refers to the  $N$  latent features,  $\text{Encode}()$  and  $\text{Decode}()$  refer to the down-sampling and up-sampling process respectively.  $\mathbf{F}$  denotes the input 3D facial shape, while  $\mathbf{F}'$  represents the reconstructed 3D facial shape. In this paper, we defined these  $N$  latent features as  $N$  facial endophenotypes. In order to make the trade-off between reconstruction error and dimensional complexity, we conducted experiments on different numbers of endophenotypes. The

optimum number was found to be 200. As shown in **Figure S3 (Supplementary)**, each endophenotype represents specific facial phenotypes. A uniform measurement  $f(z)$  was defined in **Equation S1 (Supplementary)**, to measure the effect size of each endophenotype on the facial shape. More implementation details can be found in the **Supplementary materials**.

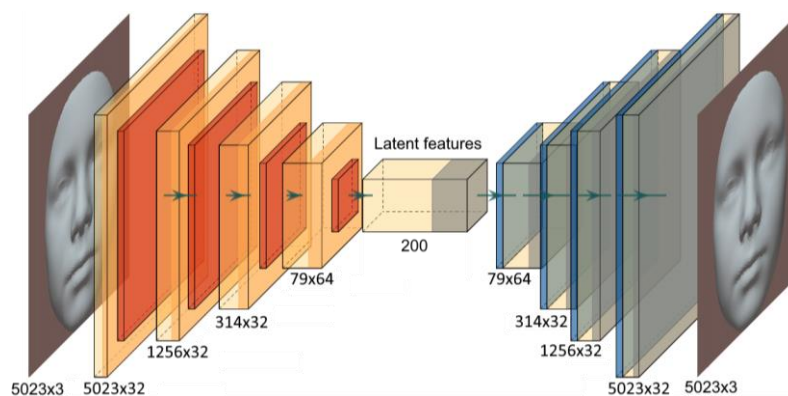

**Figure 2:** Framework of the auto-encoder. Red: down-sample process; Blue: up-sample process.

### **Statistical analysis**

After the dimensionality reduction each 3D facial image is represented by 200 endophenotypes. We performed linear regression analysis where each endophenotype was entered as dependent variable. The regression covariates included potential confounders: ethnicity, maternal age, maternal smoking in pregnancy, children BMI, age and gender.

We ran independent linear regression models for 200 facial endophenotypes. In order to correct the p-value for multiple testing, we calculated the false discovery rate (FDR) with  $\alpha = 0.05$ . We selected FDR-significant endophenotypes and mapped them back to the 3D facial shape. **Figure S3 & S4** further explain details about the mapping and visualization of selected endophenotypes on the facial shape.

The analysis was performed to examine four factors: tier of exposure, level of exposure, child ethnicity, and age. We first studied different tiers with PAE level in the exposed  $>1$  (**Figure 5**), and compared different levels of exposure for Tier 2b (**Figure 4 & S6**). Then all other results were based on Tier 2b within PAE level in the exposed  $>1$ . For the ethnicity factor, we defined 2 groups based on questionnaire information: the multi-ethnic group (including Dutch, non-Dutch Western, Turkish and Moroccan) and the Western group (including Dutch and non-Dutch Western background). We performed the analysis separately in the 9-year-old children, the 13-year-old



children, and defined 'growth'. The 'growth' was defined as the endophenotype differences between the 9- and 13-year-old children, including children assessed twice. The endophenotypes of 'growth' were computed by:

$$\mathbf{Z}_{growth} = \mathbf{Z}_{13} - \mathbf{Z}_9 \quad (3)$$

where  $\mathbf{Z}_{growth}$  refers to the growth of endophenotypes,  $\mathbf{Z}_{13}$  and  $\mathbf{Z}_9$  are endophenotypes of 13-year-old and 9-year-old children, respectively.

### ***Phenotypes recognition for PAE***

The PAE prediction was only performed in children of Dutch national origin. We used logistic regression to model binary prediction, where 200 facial endophenotypes were used for prediction of PAE. Non-exposed children were set as the control group, while children with PAE level > 1 were set as exposed group. The prediction accuracy was quantified with the area under the receiver operating characteristic curve (AUC), with 5-fold cross validation. In order to adjust for potential biases, we firstly set the above-mentioned covariates as independent variables and obtained the baseline results (model A). Then we added facial endophenotypes as independent variables to the baseline model (model B).

*F*-test is often used to identify the model that best fits the population from which the data were sampled.<sup>30</sup> Here we performed the analysis of variance (ANOVA) *F*-test on model A and model B, and then determined the *F*-value as well as *p*-value for each independent variable.

## RESULTS

The characteristics of the study population are summarized in **Table 1**. Maternal smoking, maternal age, child BMI and especially ethnicity showed imbalanced distribution between the control and exposed groups.

**Table 1:** Characteristics of children and their mothers included in the analysis.

**(a) 9-year-old children.**

| characteristic             | Control (Abstinent) | PAE Tier 1      | PAE Tier 2a      | PAE Tier 2b      |
|----------------------------|---------------------|-----------------|------------------|------------------|
|                            | (N=760)             | Exposed (N=706) | Exposed (N=1008) | Exposed (N=1683) |
| Ethnicity (%)              |                     |                 |                  |                  |
| Western                    |                     |                 |                  |                  |
| Dutch                      | 328(43.2)           | 608(86.1)       | 872(86.5)        | 1476(87.7)       |
| Non-Dutch Western          | 39(5.1)             | 74(10.5)        | 119(11.8)        | 181(10.8)        |
| Non-Western                |                     |                 |                  |                  |
| Turkish                    | 212(27.9)           | 20(2.8)         | 7(0.7)           | 16(1.0)          |
| Moroccan                   | 181(23.8)           | 4(0.6)          | 10(1.0)          | 10(0.6)          |
| Child's gender, No. (%)    |                     |                 |                  |                  |
| Male                       | 357(47.0)           | 306(43.3)       | 489(48.5)        | 823(48.9)        |
| Female                     | 403(53.0)           | 400(56.7)       | 519(51.5)        | 860(51.1)        |
| Child BMI, mean (SD)       | 18.6(3.2)           | 17.4(2.6)       | 17.1(2.2)        | 17.0(2.1)        |
| Child age, mean (SD), year | 9.8(0.4)            | 9.7(0.3)        | 9.8(0.3)         | 9.8(0.3)         |
| Maternal smoking, No. (%)  |                     |                 |                  |                  |
| No                         | 556(73.2)           | 406(57.5)       | 508(50.4)        | 846(50.3)        |
| Yes                        | 204(26.8)           | 300(42.5)       | 500(49.6)        | 837(49.7)        |
| Maternal age, mean (SD)    | 28.2(5.0)           | 30.4(4.7)       | 31.2(4.3)        | 31.7(4.1)        |

**(b) 13-year-old children.**

| characteristic             | Control (Abstinent) | PAE Tier 1      | PAE Tier 2a     | PAE Tier 2b      |
|----------------------------|---------------------|-----------------|-----------------|------------------|
|                            | (N=519)             | Exposed (N=579) | Exposed (N=822) | Exposed (N=1379) |
| Ethnicity (%)              |                     |                 |                 |                  |
| Western                    |                     |                 |                 |                  |
| Dutch                      | 237(45.7)           | 502(86.7)       | 714(86.9)       | 1206(87.5)       |
| Non-Dutch Western          | 33 (6.4)            | 61(10.5)        | 95(11.6)        | 152(11.0)        |
| Non-Western                |                     |                 |                 |                  |
| Turkish                    | 122(23.5)           | 11(1.9)         | 10(1.2)         | 17(1.2)          |
| Moroccan                   | 127(24.5)           | 5(0.9)          | 3(0.4)          | 4(0.3)           |
| Child's gender, No. (%)    |                     |                 |                 |                  |
| Male                       | 247(47.6)           | 263(45.4)       | 407(49.5)       | 690 (50.0)       |
| Female                     | 272(52.4)           | 316(54.6)       | 415(50.5)       | 689 (50.0)       |
| Child BMI, mean (SD)       | 21.1(4.0)           | 19.6(3.3)       | 19.1(2.7)       | 19.0(2.6)        |
| Child age, mean (SD), year | 13.7(0.4)           | 13.55(0.3)      | 13.6(0.3)       | 13.6(0.3)        |
| Maternal smoking, No. (%)  |                     |                 |                 |                  |
| No                         | 372(71.7)           | 346(59.8)       | 417(50.7)       | 708 (51.3)       |
| Yes                        | 147(28.3)           | 233(40.2)       | 405(49.3)       | 671 (48.7)       |
| Maternal age, mean (SD)    | 28.2(5.1)           | 30.7(4.7)       | 31.2(4.2)       | 31.7 (4.1)       |

The results of the linear regression in the 9-year-old children survived correction for multiple testing with FDR. PAE before pregnancy (Tier 1) and during pregnancy (Tier 2a & 2b) was associated with facial endophenotypes (**Table 2**). **Table S2** further shows results of dose-response assessment for different levels of PAE. No FDR-significant results were found in the 13-year-old children, or for the ‘growth’ in the longitudinal analysis. The nominal significant results ( $p$ -value < 0.05) for 9-year-old, 13-year-old and ‘growth’ can be found in **Table S3**.

Each endophenotype (index 0-199) represents specific facial phenotypes, and the facial interpretation of each single endophenotype can be found in **Figure S3**.

**Table 2:** Details about FDR-significant endophenotypes in the multi-ethnic group. 9-year-old children for PAE level > 1. Ne refers to the number of the exposed samples, while Nc refers to the number of the control samples. As defined in Equation S1 (Supplementary),  $f(z)$  is the effect size of the endophenotype on the facial shape. Facial endophenotype index with ‘W’ means they are also significant in only Western group.

**(a)** Tier 1 (PAE only before pregnancy). Ne = 278, Nc = 760

| Endophenotype Index | p-value | FDR-corrected p-value | coefficient | SE     | Mean   | Std   | f(z)   |
|---------------------|---------|-----------------------|-------------|--------|--------|-------|--------|
| 29 (W)              | 8.3e-08 | 1.7e-05               | 0.021       | 0.0040 | 0.008  | 0.052 | 197.95 |
| 44 (W)              | 1.8e-04 | 0.020                 | -0.014      | 0.0038 | 0.007  | 0.048 | 165.52 |
| 173                 | 4.2e-04 | 0.030                 | -0.014      | 0.0039 | -0.006 | 0.050 | 185.23 |

**(b)** Tier 2a (any PAE during first trimester, but abstinent during the rest trimesters). Ne = 563, Nc = 760

| Endophenotype Index | p-value | FDR-corrected p-value | coefficient | SE     | Mean    | Std   | f(z)   |
|---------------------|---------|-----------------------|-------------|--------|---------|-------|--------|
| 36 (W)              | 4.2e-06 | 8.5e-04               | 0.021       | 0.0046 | 0.010   | 0.064 | 269.78 |
| 29                  | 3.8e-05 | 0.0038                | 0.014       | 0.0035 | 0.008   | 0.052 | 197.95 |
| 139 (W)             | 1.0e-04 | 0.0069                | -0.014      | 0.0035 | 0.007   | 0.048 | 189.49 |
| 173                 | 2.8e-04 | 0.0138                | -0.013      | 0.0035 | -0.006  | 0.050 | 185.23 |
| 51                  | 5.7e-04 | 0.0230                | -0.030      | 0.0087 | -0.002  | 0.125 | 833.34 |
| 87 (W)              | 6.2e-04 | 0.0206                | -0.011      | 0.0032 | 3.5e-04 | 0.044 | 155.85 |
| 69                  | 9.5e-04 | 0.0272                | 0.019       | 0.0059 | -0.017  | 0.080 | 485.34 |
| 125                 | 1.5e-03 | 0.0381                | 0.015       | 0.0047 | 0.016   | 0.066 | 287.89 |

**(c)** Tier 2b (any PAE during first trimester). Ne = 756, Nc = 760

| Endophenotype Index | p-value | FDR-corrected p-value | coefficient | SE     | Mean    | Std   | f(z)   |
|---------------------|---------|-----------------------|-------------|--------|---------|-------|--------|
| 36 (W)              | 7.1e-05 | 0.014                 | 0.017       | 0.0044 | 0.010   | 0.064 | 269.78 |
| 139(W)              | 9.3e-05 | 0.009                 | -0.013      | 0.0033 | 0.007   | 0.048 | 189.49 |
| 29                  | 1.9e-04 | 0.013                 | 0.013       | 0.0034 | 0.008   | 0.052 | 197.95 |
| 51                  | 2.5e-04 | 0.012                 | -0.030      | 0.0083 | -0.002  | 0.125 | 833.34 |
| 69                  | 5.6e-04 | 0.023                 | 0.019       | 0.0055 | -0.017  | 0.080 | 485.34 |
| 173                 | 8.9e-04 | 0.030                 | -0.011      | 0.0033 | -0.006  | 0.050 | 185.23 |
| 87 (W)              | 1.3e-03 | 0.036                 | -0.010      | 0.0031 | 3.5e-04 | 0.044 | 155.85 |
| 57(W)               | 1.9e-03 | 0.048                 | 0.022       | 0.0070 | -0.013  | 0.101 | 648.42 |

### Visualization of results

**Figure 3 & 4** respectively show the results of different ethnic groups, and results of different PAE levels, that survive multiple testing correction. **Figure 5 & S5** shows the nominal significant results (p-value < 0.05) of different tiers, and of different ages (9-year-old, 13-year-old and the 'growth'), respectively. For all heatmaps, red areas refer to inner changes while blue areas refer to outer changes towards the geometric center of the facial shape. **Figure S3 & S4** explain how each heatmap was generated, by combining represented phenotypes of each significant endophenotype using their coefficients as weights. The most common detected facial phenotypes included turned-up nose tip, shortened nose, turned-out jaw and turned-in lower-eyelid-related regions.

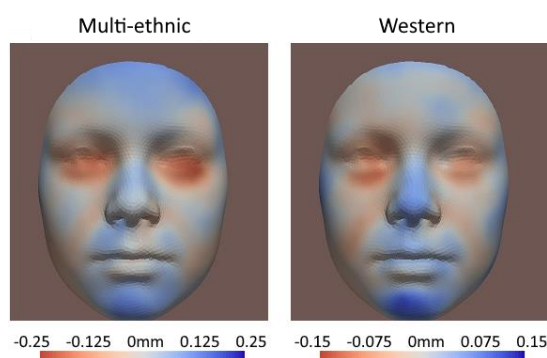

**Figure 3:** FDR-significant results of the multi-ethnic (Dutch, non-Dutch Western, Turkish and Moroccan) and the Western groups (Dutch and non-Dutch Western). Tier 2b (any PAE during first trimester), PAE level > 1 for 9-year-old children.

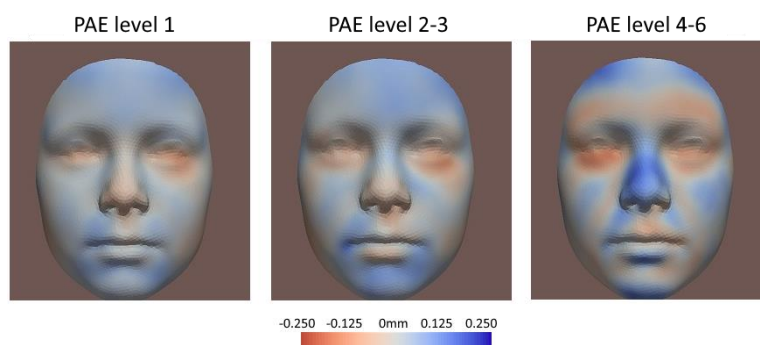

**Figure 4:** FDR-significant results of different levels of PAE. Tier 2b, multi-ethnic group for 9-year-old children. Level 1: <12 g of alcohol per week, N=887; Level 2-3: 12-72 g per week, N=643; Level 4-6: >12 g per day, N=79. Mothers who ever drank heavily (> 72 g a day) were excluded.

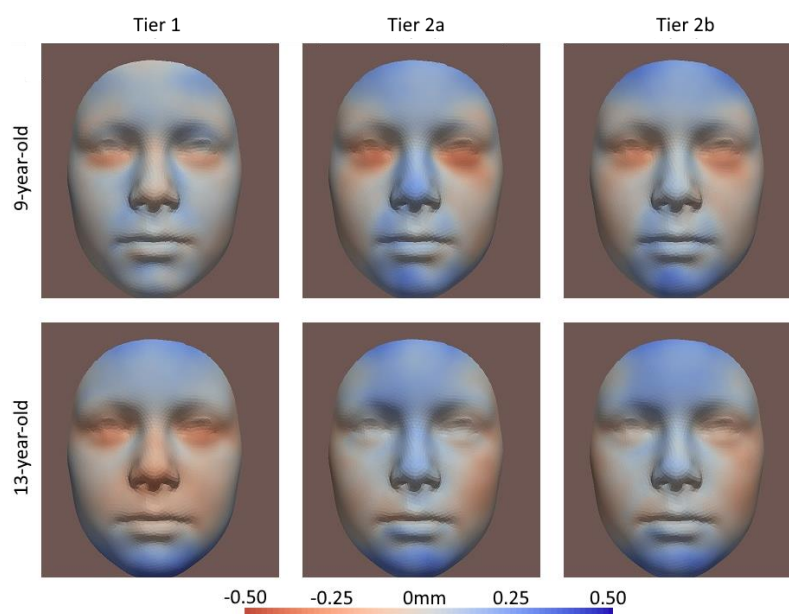

**Figure 5:** Nominal significant results of different tiers. Multi-ethnic, PAE level > 1. Tier 1: PAE only before pregnancy; Tier 2a: any PAE during first trimester, but abstinent during the rest trimesters; Tier 2b: any PAE during first trimester.

### ***Phenotypes recognition for PAE***

**Table 3** shows the prediction results of the logistic regression, where model B with facial endophenotypes as independent variables obtained slightly higher AUC than model A (baseline).

**Table S4** further shows the odds ratios (OR) of endophenotypes in the logistic regression. The highest OR is 1.25 ( $P=.008$ ; endophenotype index 36) and 1.36 ( $P=.004$ ; endophenotype index 14) for 9- and 13-year-old children, respectively. **Table S5** shows the ANOVA  $F$ -test results, which confirmed the prediction model was improved when facial endophenotypes were included.

**Table 3:** PAE prediction AUC with 5-fold cross validation. For children of Dutch national origin, PAE level > 1, Tier 2b. Ne refers to the number of the exposed samples, while Nc refers to the number of the control samples.

| Models  | Independent variables                                                     | AUC in 9-year-old    | AUC in 13-year-old   |
|---------|---------------------------------------------------------------------------|----------------------|----------------------|
|         |                                                                           | (Ne = 670, Nc = 329) | (Ne = 543, Nc = 236) |
| Model A | maternal age, maternal smoking in pregnancy, children BMI, age and gender | 0.769                | 0.756                |
| Model B | all independent variable in Model A, and 200 facial endophenotypes        | 0.782                | 0.757                |

## DISCUSSION

This study examined the association between PAE and children's facial shape by performing a multi-ethnic population-based analysis, using state-of-the-art image analysis methodology including deep-learning approaches. A significant association between fetal alcohol exposure and facial morphology was found in the 9-year-old children, with a dose-response relationship (**Figure 4 & S6, Table S2**): higher levels of alcohol exposure showed stronger associations. The most common detected facial phenotypes included turned-up nose tip, shortened nose, turned-out jaw and turned-in lower-eyelid-related regions.

The association between low levels of PAE and children's facial shape has been previously reported, but our study found an association at a much lower dose of exposure. Muggli et al.<sup>9</sup> found a significant association at a low PAE level < 70 g of alcohol per week, in 12-month-old babies. Iveli et al.<sup>43</sup> considered a light consumption < 700 mL per trimester (roughly < 46 g per week) and found that 66% of 79 newborns in the exposed group had some facial abnormality. However, in Tier 2b which assessed the dose-response (**Figure 4 & Table S2**), where mothers who ever drank heavily (> 72 g a day) were excluded, we found that even if mothers drank very little (< 12 g per week) during pregnancy, the association between PAE and children's facial shape could be observed.

The associations of PAE with children's facial shape attenuated as children became older. As the results of different ages shown in **Figure S5**, for some phenotypes, the association we observed in 9-year-old children, were attenuated in the 13-year-old children. These changes were consistent with the heatmaps of 'growth', where 'growth' was defined endophenotype differences between the 9- and 13-year-old children (**Equation 3**). Besides, the results of Muggli et al. and ours differ from those of Howe et al.,<sup>10</sup> where no association was found in the 15-year-old children. Possibly this discrepancy can be explained by a further attenuation of the association. Our results suggest that as children grow up, the association of PAE with children's facial shape become weaker. This finding is consistent with the associations of PAE with children's weight, height, and head circumference that attenuate as children become older.<sup>17,18</sup> One possible explanation for this change over lifetime might be the impact of the environment. With age some alcohol-related phenotypes on the facial shape of children might be obscured by environmental influences,

especially at the peak age of facial development (12-14 years for boys and 10-12 years for girls).<sup>35,36</sup> Further investigations on the mechanism of association are needed to fully understand how the association between PAE and children's facial shape develop and then attenuated with age.

The associations of PAE with children's facial shape were similar in Tier 2a & 2b (Tier 2a: any PAE during first trimester, but abstinent during the rest trimesters; Tier 2b: any PAE during first trimester). This suggests that the associations were mainly explained by alcohol exposure during the first trimester of the pregnancy. Besides, we also examined the association of PAE before pregnancy with children's facial shape. A significant association was found in Tier 1 (PAE only before pregnancy), but weaker than those of Tier 2 (PAE during pregnancy). It is worth noting that 99% of drinking mothers in Tier 2 also drank before pregnancy, but none of those drinking in Tier 1 also drank during pregnancy. Thus, the comparison (**Table 2 & Figure 5**) between Tier 1 and Tier 2 indicated that associations of PAE with children's facial shape were stronger in mothers who continued to drink during pregnancy (Tier 2), than in those who stopped when becoming pregnant (Tier 1). To the best of our knowledge, this study is the first to examine the association between PAE and children's faces including exposures up to 3 months before pregnancy. Previous studies show PAE before pregnancy is associated with other aspects of child developments, and the association is explained by maternal metabolic disorders such as impaired maternal glucose homeostasis and hepatic steatosis.<sup>31-33</sup> The mechanism of the association with the face could be similar, but further investigations are needed to test this.

We compared the associations of PAE with facial morphology between the multi-ethnic group (Dutch, non-Dutch Western, Turkish and Moroccan) and the Western group (Dutch, non-Dutch Western), in which ethnicity was included as a covariate in the statistical analysis. The association we found were similar across ethnic groups. This suggests that the findings in the multi-ethnic group are not driven by the ethnicity, i.e., the linear regression model successfully adjusted for ethnicity as confounding bias.

### ***Strengthens and limitations***

This study is a well-described population-based prospective cohort of multi-ethnic children. We have a large sample size with detailed PAE data that allows exposure classifications not available in

many other studies. The deep-learning approaches exploited in this study represent the state-of-the-art method for high-dimensional 3D facial shape analysis.<sup>21,34</sup> We integrated it with traditional linear and logistic regression models, to better interpret and validate the results in a conventional manner. Benefiting from these settings, the method used in this study is sensitive enough to detect association of mild alcohol consumption.

We also used derived endophenotypes for the prediction of PAE. Although the AUC increase with facial endophenotypes was rather small, the result still indicated that specific facial phenotypes provided additional and independent clues for association of PAE, which were confirmed by the odds ratio and *F*-tests (**Table S4 & S5**). Moreover, this shows that such a facial endophenotype approach could be valuable to study or diagnose other type of conditions.

Craniofacial development closely corresponds to brain development.<sup>42</sup> Thus, classic facial features of FASD such as short palpebral fissure, smooth philtrum, and thin upper lip have been linked to brain abnormalities and cognitive outcome in FASD and have been used to diagnose children at risk of developing neurobehavioral deficits.<sup>9,37,38</sup> Low-moderate PAE has also shown adverse associations with children's brain cognitive development, resulting in psychological and behavioral problems.<sup>39-41</sup> Although the connection between these cognitive problems and facial phenotypes is still unknown, the endophenotypes we discovered in this study are potentially useful to assist in identifying children at risk of developing these cognitive problems, which should be further substantiated in future studies.

We had no data for alcohol consumption more than three months prior to pregnancy and thus do not know if maternal drinking had chronic effects. The self-reported questionnaire might not reflect the accuracy alcohol measurements because mothers may have denied their alcohol consumption.



## **CONCLUSIONS**

The results of this study suggest that low to moderate maternal alcohol consumption up to three months before and during the pregnancy is associated with the facial appearance of children. The association with facial morphology of the offspring was attenuated with increasing age. Future studies must show if facial morphology is related to child health and development. Our results imply that facial morphology, such as quantified by the approach we proposed here, can be used as a biomarker in further investigations. Furthermore, our study suggests that for women who are pregnant or want to become pregnant soon, should quit alcohol consumption several months before conception and completely during pregnancy to avoid adverse health outcomes in the offspring.

## **ACKNOWLEDGEMENTS**

The Generation R Study is conducted by the Erasmus MC in close collaboration with the School of Law and Faculty of Social Sciences of the Erasmus University Rotterdam, the Municipal Health Service Rotterdam area, Rotterdam, the Rotterdam Homecare Foundation, Rotterdam and the Stichting Trombosedienst & Artsenlaboratorium Rijnmond (STAR-MDC), Rotterdam. We gratefully acknowledge the contribution of children and parents, general practitioners, hospitals, midwives, and pharmacies in Rotterdam.

## **Disclosure of interest**

There are no potential conflicts of interest

## **Contribution of Authorship**

All authors have made significant contributions to this scientific work and approved the final version of the manuscript. XL was involved in the conception and design of the study, performed the data analyses and wrote the manuscript. GR supervised the data analyses, and co-wrote the manuscript. MK made contribution to result discussion, result interpretation and manuscript writing. HT made critical revisions on the manuscripts and provided extensive feedbacks. VVWJ, FR, SAK, WN and EW were involved in the conception and design of the study, reviewed the manuscript, and provided consultation regarding the analyses and interpretation of the data.

### **Details of Ethics Approval**

The study was approved by the Medical Ethics Committee (MEC) of the Erasmus Medical Center Rotterdam, The Netherlands (MEC 198.782/2001/31), and written informed consent was obtained from all participants themselves, or on that of their guardians/parents.

## REFERENCES

1. POSKITT EME. FOETAL ALCOHOL SYNDROME, *Alcohol and Alcoholism*. 1984; 19(2):159–165,
2. Jones KL, Smith DW. Recognition of the fetal alcohol syndrome in early pregnancy. *Lancet*. 1973; ii:999–1001
3. Jaddoe VWV, Bakker R, Hofman A, Mackenbach JP, Moll HA, Steegers EAP, Witteman JCM. Moderate Alcohol Consumption During Pregnancy and the Risk of Low Birth Weight and Preterm Birth. The Generation R Study, *Annals of Epidemiology*. 2007; 17(10): 834-840
4. Zaidel DW, Aarde SM, Baig K. Appearance of symmetry, beauty, and health in human faces, *Brain and Cognition*. 2005; 57(3):261-263
5. Smith MJ, Perrett DI, Jones BC, et al. Facial appearance is a cue to oestrogen levels in women. *Proc Biol Sci*. 2006; 273(1583):135-140. doi:10.1098/rspb.2005.2296
6. Douglas TS, Mutsvangwa TEM. A review of facial image analysis for delineation of the facial phenotype associated with fetal alcohol syndrome. *Am J Med Genet Part A*. 2010; 152A:528–536
7. Farkas L. Anthropometry of the Head and Face. *New York: Raven Press*. 1994
8. Astley SJ, Clarren SK. A case definition and photographic screening tool for the facial phenotype of fetal alcohol syndrome. *J Pediatr*. 1996; 129: 33–41
9. Muggli E, Matthews H, Penington A, et al. Association Between Prenatal Alcohol Exposure and Craniofacial Shape of Children at 12 Months of Age. *JAMA Pediatr*. 2017; 171(8):771–780. doi:10.1001/jamapediatrics.2017.0778
10. Howe LJ, Sharp GC, Hemani G, Zuccolo L, Richmond S, Lewis SJ. Prenatal alcohol exposure and facial morphology in a UK cohort, *Drug and Alcohol Dependence*. 2019; 197:42-47
11. LeCun Y, Bengio Y, Hinton G. Deep learning. *Nature*. 2015; 521, 436–444
12. Miotto R, Li, L, Kidd, BA, Dudley JT. Deep Patient: An Unsupervised Representation to Predict the Future of Patients from the Electronic Health Records. *Sci Rep* 6, 26094 (2016). doi:10.1038/srep26094
13. Dwivedi SK, Tjärnberg A, Tegnér J, Gustafsson M. Deriving disease modules from the compressed transcriptional space embedded in a deep autoencoder. *Nat Commun* 11, 856 (2020). doi:10.1038/s41467-020-14666-6
14. Asaoka R, Murata H, Asano S, et al. The usefulness of the Deep Learning method of variational autoencoder to reduce measurement noise in glaucomatous visual fields. *Sci Rep* 10, 7893 (2020). doi:10.1038/s41598-020-64869-6
15. Kingma DP, Welling M. An Introduction to Variational Autoencoders, *Foundations and Trends® in Machine Learning*.

2019;12(4):307-392

16. Jaddoe VW, Mackenbach JP, Moll HA, Steegers EA, Tiemeier H, Verhulst FC, et al. The Generation R Study: study design and cohort profile. *Eur J Epidemiol.* 2006; 21:475–484

17. Carter RC, Jacobson JL, Sokol RJ, Avison MJ, Jacobson SW. Fetal alcohol-related growth restriction from birth through young adulthood and moderating effects of maternal prepregnancy weight. *Alcohol Clin Exp Res.* 2013;37(3): 452-462. doi:10.1111/j.1530-0277.2012.01940.x

18. Day NL, Leech SL, Richardson GA, Cornelius MD, Robles N, Larkby C. Prenatal alcohol exposure predicts continued deficits in offspring size at 14 years of age. *Alcohol Clin Exp Res.* 2002 Oct;26(10):1584-91. doi: 10.1097/01.ALC.0000034036.75248.D9. PMID: 12394293

19. Day NL, Zuo Y, Richardson GA, Goldschmidt L, Larkby CA, Cornelius MD. Prenatal alcohol use and offspring size at 10 years of age. *Alcohol Clin Exp Res.* 1999 May;23(5):863-9. PMID: 10371407

20. Streissguth AP, Barr HM, Sampson PD, Bookstein FL. Prenatal alcohol and offspring development: the first fourteen years. *Drug Alcohol Depend.* 1994 Oct;36(2):89-99. doi:10.1016/0376-8716(94)90090-6. PMID: 7851285

21. Gong S, Chen L, Bronstein M and Zafeiriou S. SpiralNet++: A Fast and Highly Efficient Mesh Convolution Operator, *IEEE/CVF International Conference on Computer Vision Workshop (ICCVW)*, Seoul, Korea (South), 2019, pp. 4141-4148, doi:10.1109/ICCVW.2019.00509

22. Lipinski RJ, Hammond P, O'Leary-Moore SK, et al. Ethanol-induced face-brain dysmorphology patterns are correlative and exposure-stage dependent. *PLoS One.* 2012;7(8): e43067

23. Smith SM, Garic A, Flentke GR, Berres ME. Neural crest development in fetal alcohol syndrome. *Birth Defects Res C Embryo Today.* 2014; 102(3):210-220

24. Yang Y, Phillips OR, Kan E, et al. Callosal thickness reductions relate to facial dysmorphology in fetal alcohol spectrum disorders. *Alcohol Clin Exp Res.* 2012;36(5):798-806

25. Zuccolo L, Lewis SJ, Smith GD, et al. Prenatal alcohol exposure and offspring cognition and school performance. A 'Mendelian randomization' natural experiment. *Int J Epidemiol.* 2013;42(5):1358-1370

26. Lewis SJ, Zuccolo L, Davey Smith G, et al. Fetal alcohol exposure and IQ at age 8: evidence from a population-based birth-cohort study. *PLoS One.* 2012;7(11):e49407

27. Hsu R, Jain AK. Face modeling for recognition, *Proceedings 2001 International Conference on Image Processing (Cat. No.01CH37205)*, Thessaloniki, Greece, 2001, pp. 693-696 vol.2, doi:10.1109/ICIP.2001.958588

28. Cordero DR, Brugmann S, Chu Y, Bajpai R, Jame M, Helms JA. Cranial neural crest cells on the move: their roles in craniofacial development. *Am J Med Genet.* 2011;155:270–279

29. Tzahor E. Heart and craniofacial muscle development: a new developmental theme of distinct myogenic fields. *Dev Biol.* 2009;327: 273–279.
30. Thomas M. Ludden, Stuart L. Beal, Lewis B. Sheiner, Comparison of the Akaike Information Criterion, the Schwarz Criterion and the F Test as Guides to Model Selection, *Journal of Pharmacokinetics and Biopharmaceutics.* 1994;22(5): 431–445
31. Lee, Y.J., Kim, J.Y., Lee, D.Y. et al. Alcohol consumption before pregnancy causes detrimental fetal development and maternal metabolic disorders. *Sci Rep.* 2020(10); 10054. doi:10.1038/s41598-020-66971-1
32. Nykjaer C, Alwan NA, Greenwood DC. Maternal alcohol intake prior to and during pregnancy and risk of adverse birth outcomes: evidence from a British cohort. *J Epidemiol Community Health.* 2014; 68:542-549.
33. McDonald BW, Watson PE. Maternal alcohol intakes before and during pregnancy: Impact on the mother and infant outcome to 18 months. *Nordic Studies on Alcohol and Drugs.* 2020;37(2):153-171.
34. Hanocka R, Hertz A, Fish N, Giryes R, Fleishman S, Cohen-Or D. MeshCNN: A Network with an Edge. *ACM Trans. Graph.* 2019; 38(4). doi:10.1145/3306346.3322959
35. Baughan B, Demirjian A, Levesque GY, Lapalme-Chaput L. The pattern of facial growth before and during puberty, as shown by French-Canadian girls. *Ann Hum Biol.* 1979;6(1):59-76.
36. Mellion ZJ, Behrents RG, Johnston LE Jr. The pattern of facial skeletal growth and its relationship to various common indexes of maturation. *Am J Orthod Dentofacial Orthop.* 2013;143(6):845-54.
37. Suttie M, Foroud T, Wetherill L, et al. Facial dysmorphism across the fetal alcohol spectrum. *Pediatrics.* 2013;131(3):e779-e788.
38. Smith SM, Garic A, Flentke GR, Berres ME. Neural crest development in fetal alcohol syndrome. *Birth Defects Res C Embryo Today.* 2014; 102(3):210-220
39. Briana Lees, Louise Mewton, et al. Association of Prenatal Alcohol Exposure with Psychological, Behavioral, and Neurodevelopmental Outcomes in Children From the Adolescent Brain Cognitive Development Study. *American Journal of Psychiatry.* 2020;177(11):1060-1072
40. Willford J, Leech S, Day N. Moderate prenatal alcohol exposure and cognitive status of children at age 10. *Alcohol Clin Exp Res.* 2006 Jun;30(6):1051-9.
41. Larroque B, Kaminski M, Dehaene P, Subtil D, Delfosse MJ, Querleu D. Moderate prenatal alcohol exposure and psychomotor development at preschool age. *Am J Public Health.* 1995;85(12):1654-1661
42. Naqvi, S., Sley, Y., Hoskens, H. et al. Shared heritability of human face and brain shape. *Nat Genet.* 2021; doi:

[10.1038/s41588-021-00827-w](#)

**43.** Iveli, M., Morales, S., Rebolledo, A. et al. Effects of Light Ethanol Consumption During Pregnancy: Increased Frequency of Minor Anomalies in the Newborn and Altered Contractility of Umbilical Cord Artery. *Pediatr Res.* 2007;61: 456–461.

**44.** Little RE. Moderate alcohol use during pregnancy and decreased infant birth weight. *Am J Public Health.* 1977;67(12):1154-1156.

**45.** Booth, J., Roussos, A., Ponniah, A. et al. Large Scale 3D Morphable Models. *Int J Comput Vis.* 2018;126: 233–254
